# Supplementary material
Source: PubMed Central journal article supplement (PMC3855366)
Supplement: NIHMS523077-supplement-13361_2013_727_MOESM1_ESM.pdf [file NIHMS523077-supplement-13361_2013_727_MOESM1_ESM.pdf]

## Supplementary Material

### Analysis of Overlapped and Noisy Hydrogen/Deuterium Exchange Mass Spectra

Miklos Guttman<sup>1#</sup>, David D. Weis<sup>2</sup>, John R. Engen<sup>3</sup>, Kelly K. Lee<sup>1</sup>

<sup>1</sup> Department of Medicinal Chemistry; University of Washington, Seattle, WA 98195

<sup>2</sup> Department of Chemistry, University of Kansas, Lawrence, KS 66045

<sup>3</sup> Department of Chemistry & Chemical Biology, Northeastern University, Boston, MA  
02115

# Address correspondence to: mguttman@uw.edu; 206-616-3496; 206-685-3252 (fax)

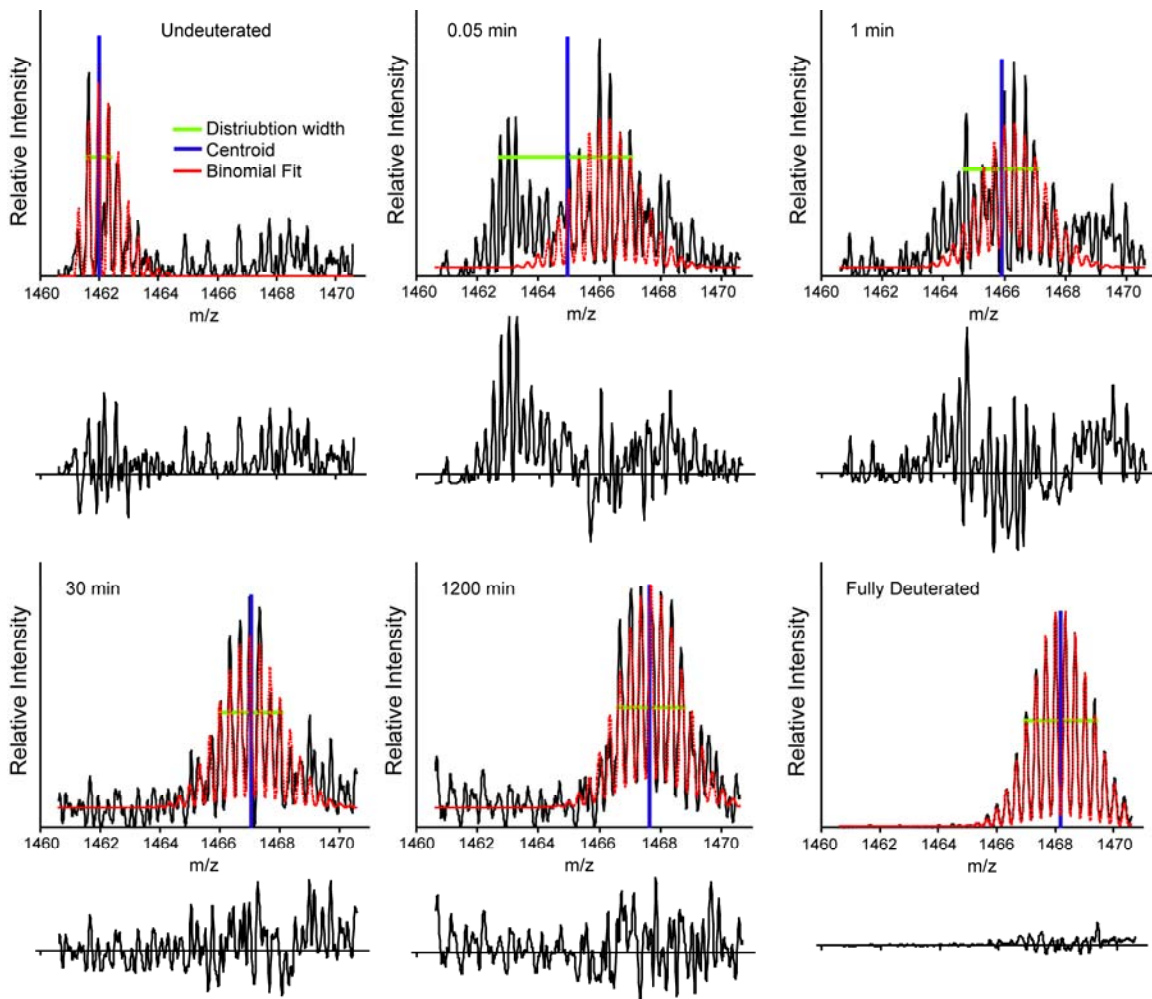

Supplementary Figure 1: Raw spectral fitting to calculate the deuterium uptake of a glycopeptide with relatively weak signal to noise. The modeled binomial distribution (red) is overlaid with the raw spectral data (black). The 0.05 min and 1 min time points contain some signal at slightly lower m/z from a higher charge state of a different peptide that was not resolved by chromatography. Residuals are shown under each time point. Peak centers and widths from centroid analysis are shown with blue and green lines.
